# Supplementary material
Source: MDPI journal article supplement (https://www.mdpi.com/2073-4344/11/6/688)
Supplement: s1 [file s1]

### Supplementary Information

Figure S1 presents the reactor setup and the filter packing.

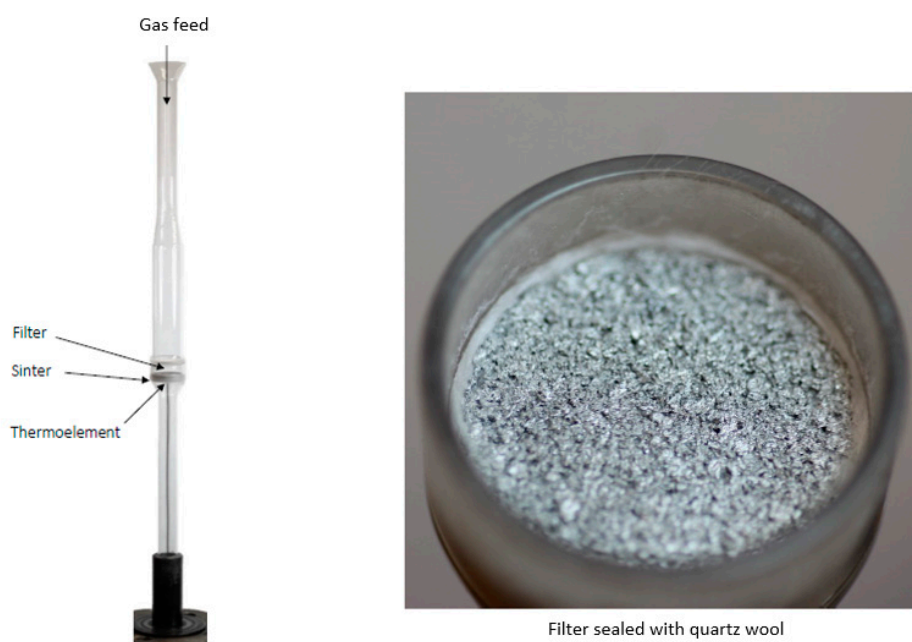

**Figure S1.** Reactor configuration and the filter packing.
